# Supplementary material for: Thioether bond formation by SPASM domain radical SAM enzymes: Cα H-atom abstraction in subtilosin A biosynthesis
Source: Royal Society of Chemistry journal article supplement (doi:10.1039/c6cc01317a), 2016-01-01
Supplement: c6cc01317a1.pdf [file c6cc01317a1.pdf]

## Supplementary information

# Thioether Bond Formation By SPASM Domain Radical SAM Enzymes: C<sub>α</sub> H-Atom Abstraction In Subtilosin A Biosynthesis

A. Benjdia<sup>a</sup>, A. Guillot<sup>a</sup>, B. Lefranc<sup>b,c</sup>, H. Vaudry<sup>b,c</sup>, J. Leprince<sup>b,c</sup> and O. Berteau<sup>a\*</sup>

[a] Micalis Institute, ChemSyBio, INRA, AgroParisTech, Université Paris-Saclay, 78350 Jouy-en-Josas, France

[b] INSERM U982, F-76821 Mont-Saint-Aignan, France

[c] Institute for Research and Innovation in Biomedicine (IRIB), Regional Platform for Cell Imaging, PRIMACEN  
University of Rouen, F-76821 Mont-Saint-Aignan, France

\*E-mail: Olivier.Berteau@jouy.inra.fr

## Experimental procedure

**Peptides synthesis.** All peptides, Ac-SIGAACLVDGPIPDFEIAAG-NH<sub>2</sub> (**SboA<sub>8-27</sub>**), Ac-ATGLFGLWGNKGCAT-NH<sub>2</sub> (**SboA<sub>27-6</sub>**), Ac-ATGL(phenyl-D<sub>5</sub>,  $\alpha,\beta,\beta$ -D<sub>3</sub>)FGLWGNKGCAT-NH<sub>2</sub> (**SboA<sub>27-6</sub>-F**) and Ac-ATGLFGLWGNKG( $\beta,\beta$ -D<sub>2</sub>)CAT-NH<sub>2</sub> (**SboA<sub>27-6</sub>-C**) were synthesized (0.1-mmol scale) by the solid phase methodology on a Rink amide 4-methylbenzhydrylamine resin (VWR, Fontenay-Sous-Bois, France) using a 433A Applied Biosystems peptide synthesizer (Applera-France, Courtaboeuf, France) and the standard Fmoc manufacturer's procedure. All Fmoc-amino acids (1 mmol, 10 eq., Christof Senn Laboratories, Dielsdorf, Switzerland), including the per-deuterated phenylalanyl residue Fmoc-(phenyl-D<sub>5</sub>,  $\alpha,\beta,\beta$ -D<sub>3</sub>)Phe-OH and Fmoc-( $\beta,\beta$ -D<sub>2</sub>)Cys(Trt)-OH (Sigma-Aldrich, Saint-Quentin-Fallavier, France) were coupled by *in situ* activation with HBTU/HOBt (1.25 mmol:1.25 mmol, 12.5 eq.) and DIEA (2.5 mmol, 25 eq.) in NMP. Peptides were deprotected and cleaved from the resin by adding 10 mL of the mixture TFA/phenol/H<sub>2</sub>O/thioanisole/ethanedithiol (82.5:5:5:5:2.5, v/v/v/v/v; reagent K) for 120 min at room temperature. After filtration, crude peptides were precipitated by addition of tertbutylmethylether (TBME), centrifuged (4,500 rpm), washed twice with TBME, and freeze-dried. The synthetic peptides were purified by reversed-phase HPLC on a 2.2 x 25-cm Vydac 218TP1022 C<sub>18</sub> column (Grace, Epemnon, France) by using a linear gradient (20-50% over 45 min) of CH<sub>3</sub>CN/TFA (99.9:0.1 ; v/v) at a flow rate of 10 mL.min<sup>-1</sup>. Analytical HPLC, performed on a 0.46 x 25-cm Vydac 218TP54 C<sub>18</sub> column (Grace), showed that the purity of the peptides was >99.5%. The purified peptides were characterized by MALDI-TOF mass spectrometry on a Voyager DE-PRO (Applera-France) in the reflector mode with  $\alpha$ -cyano-4-hydroxycinnamic acid as a matrix.

**AlbA expression and purification.** Plasmid containing the albA gene was constructed by amplifying albA from *B. subtilis* 168 strain. The oligonucleotides alba-F (GGTCTCAGCGCCTTGTTTATAGAGCAGATGTTTCCATTATT) and alba-R (GGTCTCATATCCTAAATAAGCTGGACCACGTCTTCTAATTG) were used to amplify albA. The 1.8 kb BsaI/BsaI fragment containing the gene was ligated into pASK17+ plasmid to produce the recombinant plasmid pASK-albA expressing AlbA fused with an N-terminal strep-Tag. The entire cloned gene was sequenced to ensure that no error was introduced. *E. coli* BL21 (DE3) star transformed with pASK-albA were used to inoculate fresh LB medium (9 L) supplemented with ampicillin (100  $\mu$ g.mL<sup>-1</sup>) and bacterial growth proceeded at 37°C until the OD600 reached between 0.6-0.8. Protein expression was induced by adding 9 mL of anhydrotetracycline (0.2 mg.mL<sup>-1</sup>). After 24 hours at 18°C, the cells were collected by centrifugation at 5,000 x g for 20 minutes. The cells were suspended in 10 mL of buffer A (Tris 50 mM, KCl 300 mM, NaCl 0.5 mM, glycerol 10%, pH 8). The cells were disrupted by sonication on ice after addition of Triton X100 and 0.5% of 2-mercaptoethanol. The protein extract was centrifuged at 45,000 x g at 4°C for 1.5 hour. The solution obtained was loaded onto a streptactin high capacity column (IBA) previously equilibrated with buffer A. The column was washed with 5 column volumes of buffer A. Proteins were eluted with 9 mL of buffer A containing 1 mM of desthiobiotin and dithiothreitol (DTT, 3 mM). The purified protein, after concentration, was stored at -80°C and the purity was assayed on a 12% SDS PAGE.

**Spectrophotometric measurement.** UV-visible absorption spectra were recorded on a Beckman DU 640 spectrophotometer.

**AlbA assay.** Enzymatic assays were carried out in an anaerobic chamber (Bactron IV) with an atmosphere constituted of 5% H<sub>2</sub>, 10% CO<sub>2</sub> and 85% N<sub>2</sub>. AlbA was reconstituted by adding 3 mM of

DTT at 12°C during 15 minutes. Then, Na<sub>2</sub>S and (NH<sub>4</sub>)<sub>2</sub>Fe(SO<sub>4</sub>)<sub>2</sub> (12 equivalents) were added and the solution was incubated at 12°C overnight. The protein was then desalted to remove unbounded iron and sulfide and concentrated. The reaction mixture was composed of AlbA (20 μM), peptide substrate (1 mM), S-adenosyl-L-methionine (1 mM) and DTT (6 mM). Incubations were performed at 25°C under strict anaerobic conditions with a one-electron donor (*i.e.* sodium dithionite or flavodoxin/flavodoxin reductase/NADPH+).

**HPLC analysis.** Samples (3 μL) were diluted with 27 μL of trifluoroacetic acid solution (TFA 0.1%). HPLC analysis was carried out on an Agilent 1200 series Infinity chromatographic system with a reversed phase column (LiChroCART RP-18e 5 μm). The column was equilibrated with 100% solvent A (H<sub>2</sub>O, 0.1% TFA) and solvent B (80% CH<sub>3</sub>CN, 0.1% TFA) was applied with the following gradient: 0-1 min 0% B; 1-15 min, a linear gradient to 20% B; 15-50 min, a linear gradient to 60% B; 50-55 min, a linear gradient to 0% B at a flow rate of 1 mL.min<sup>-1</sup>.

**LC-MS/MS analysis.** LC-MS analysis was performed on an NanoLC-Ultra system (Eksigent). Each reaction was diluted 100 times and 4 μL were loaded at 7.5 μL.min<sup>-1</sup> on a cartridge (stationary phase: PepMap 100 C<sub>18</sub>, 5 μm; column: 300 μm i.d., 5 mm; Dionex) and desalted with 0.1% formic acid (FA). After 3 min, the cartridge was connected to the separating C<sub>18</sub> column (stationary phase: C<sub>18</sub> Bio-sphere, 3 μm; column: 75 μm i.d., 150 mm; Nanoseparations). Buffers were H<sub>2</sub>O, 0.1% FA (A) and CH<sub>3</sub>CN, 0.1% FA (B). The peptide separation was achieved with a linear gradient from 5 to 65% for 30 min of buffer B at 300 nL.min<sup>-1</sup>. Eluted peptides were analyzed on-line with a QExactive mass spec-trometer (Thermo Electron) using a nanoelectrospray interface piloted by Xcalibur 2.1 version. Peptide ionization was performed with picotip emitters (20 μm i.d.; New objective) in a liquid junction with an ionization potential of 1.4 KV. Peptides were detected by the Orbitrap mass analyser in full MS scan mode with a range of mass-to-charge ratio (m/z) between 400 to 1400, at a resolution potency of 70000. The doubly charged ions corresponding to cyclic and linear peptides were specifically selected for fragmentation (MS/MS) during the complete separation by the HCD fragmentation mode with a normalized collision energy of 20%, at a resolution of 17,500. The spectra were merged and analyzed manually in Qualbrowser software (Thermo Xcalibur version 2.2.44).

**Model of AlbA iron-sulfur centers.** Using the structure of anSME (PDB: 4k38) and i-Tasser program a model for AlbA from residues 117 to 446 was generated (estimated r.m.s.d is of 4.1±2.8 Å, i-Tasser source). Based on i-Tasser, the best identified structural analog is anSME (PDB: 4k36). The structure superposition was performed with Coot using the SSM program and all residues.

**Figure S1**

**Figure S1 - Peptides used in this study:** The leader peptide which is cleaved after subtilisin A cyclization is indicated by purple residues while the residues in red are those involved in thioether bonds.

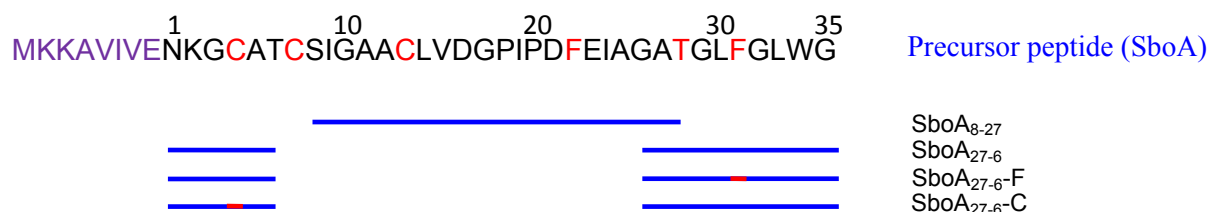

Based on SboA sequence, peptides covering the entire sequence of mature SboA have been synthesized.

SboA<sub>8-27</sub>: Ac-SIGAACLVDGPIPDFEIAGA-NH<sub>2</sub>  
 SboA<sub>27-6</sub>: Ac-ATGLFGLWGNKGCAT-NH<sub>2</sub>  
 SboA<sub>27-6</sub>-F: Ac-ATGLFGLWGNKGCAT-NH<sub>2</sub>  
 SboA<sub>27-6</sub>-C: Ac-ATGLFGLWGNKGCAT-NH<sub>2</sub>

All synthetic peptides had a N-terminal acetylation and a C-terminal amidation. In SboA<sub>27-6</sub>-F, the letter F in red indicates a per-deuterated residue while in SboA<sub>27-6</sub>-C, the letter C in red indicates a (β,β-D<sub>2</sub>) cysteine residue.

The theoretical molecular weights of singly- and doubly-charged parent ions (including post-translational modifications) of the peptides used in this study are:

| Peptide                                                               | Molecular formula                                                                 | [M+H] <sup>+</sup> | [M+2H] <sup>2+</sup> |
|-----------------------------------------------------------------------|-----------------------------------------------------------------------------------|--------------------|----------------------|
| SboA <sub>8-27</sub>                                                  | C <sub>87</sub> H <sub>137</sub> N <sub>21</sub> O <sub>28</sub> S                | 1956.974           | 978.991              |
| SboA <sub>8-27</sub> * (with a thioether bond)                        | C <sub>87</sub> H <sub>135</sub> N <sub>21</sub> O <sub>28</sub> S                | 1954.958           | 977.983              |
| SboA <sub>27-6</sub>                                                  | C <sub>69</sub> H <sub>105</sub> N <sub>19</sub> O <sub>19</sub> S                | 1536.763           | 768.886              |
| SboA <sub>27-6</sub> * (with a thioether bond)                        | C <sub>69</sub> H <sub>103</sub> N <sub>19</sub> O <sub>19</sub> S                | 1534.747           | 767.878              |
| SboA <sub>27-6</sub> -F (containing a per-deuterated phenylalanine)   | C <sub>69</sub> H <sub>97</sub> D <sub>8</sub> N <sub>19</sub> O <sub>19</sub> S  | 1544.812           | 772.910              |
| SboA <sub>27-6</sub> -F* (with a thioether bond)                      | C <sub>69</sub> H <sub>96</sub> D <sub>7</sub> N <sub>19</sub> O <sub>19</sub> S  | 1541.886           | 771.447              |
| SboA <sub>27-6</sub> -C (containing a (β,β-D <sub>2</sub> ) cysteine) | C <sub>69</sub> H <sub>103</sub> D <sub>2</sub> N <sub>19</sub> O <sub>19</sub> S | 1538.763           | 769.886              |
| SboA <sub>27-6</sub> -C* (with a thioether bond)                      | C <sub>69</sub> H <sub>101</sub> D <sub>2</sub> N <sub>19</sub> O <sub>19</sub> S | 1536.747           | 768.878              |

**Figure S2**

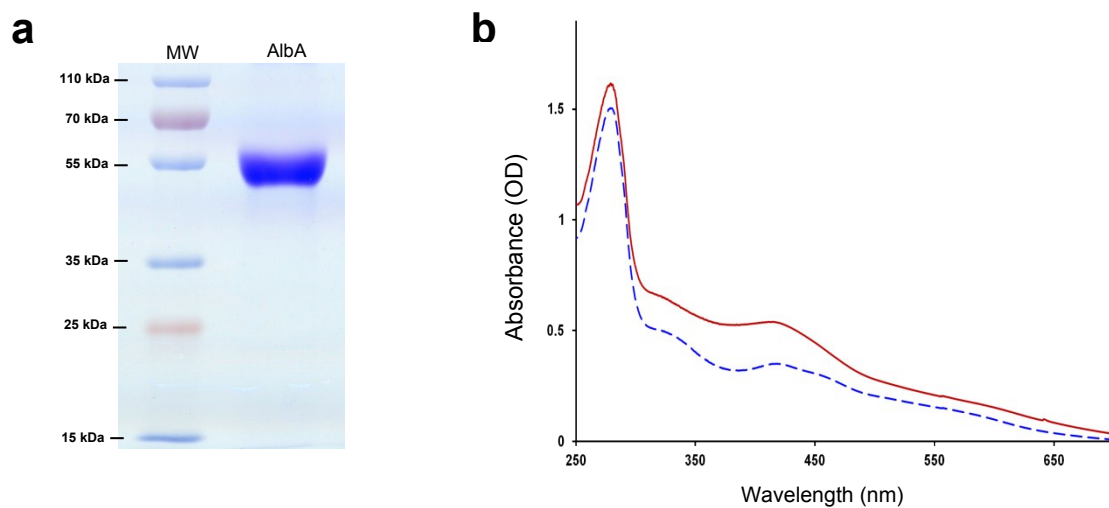

**Figure S2 - (a) Gel electrophoresis analysis of AlbA.** Molecular weight markers (MW), and purified AlbA. **(b) UV-visible analysis of AlbA before (dashed blue line) and after (solid red line) anaerobic reconstitution.**

Figure S3

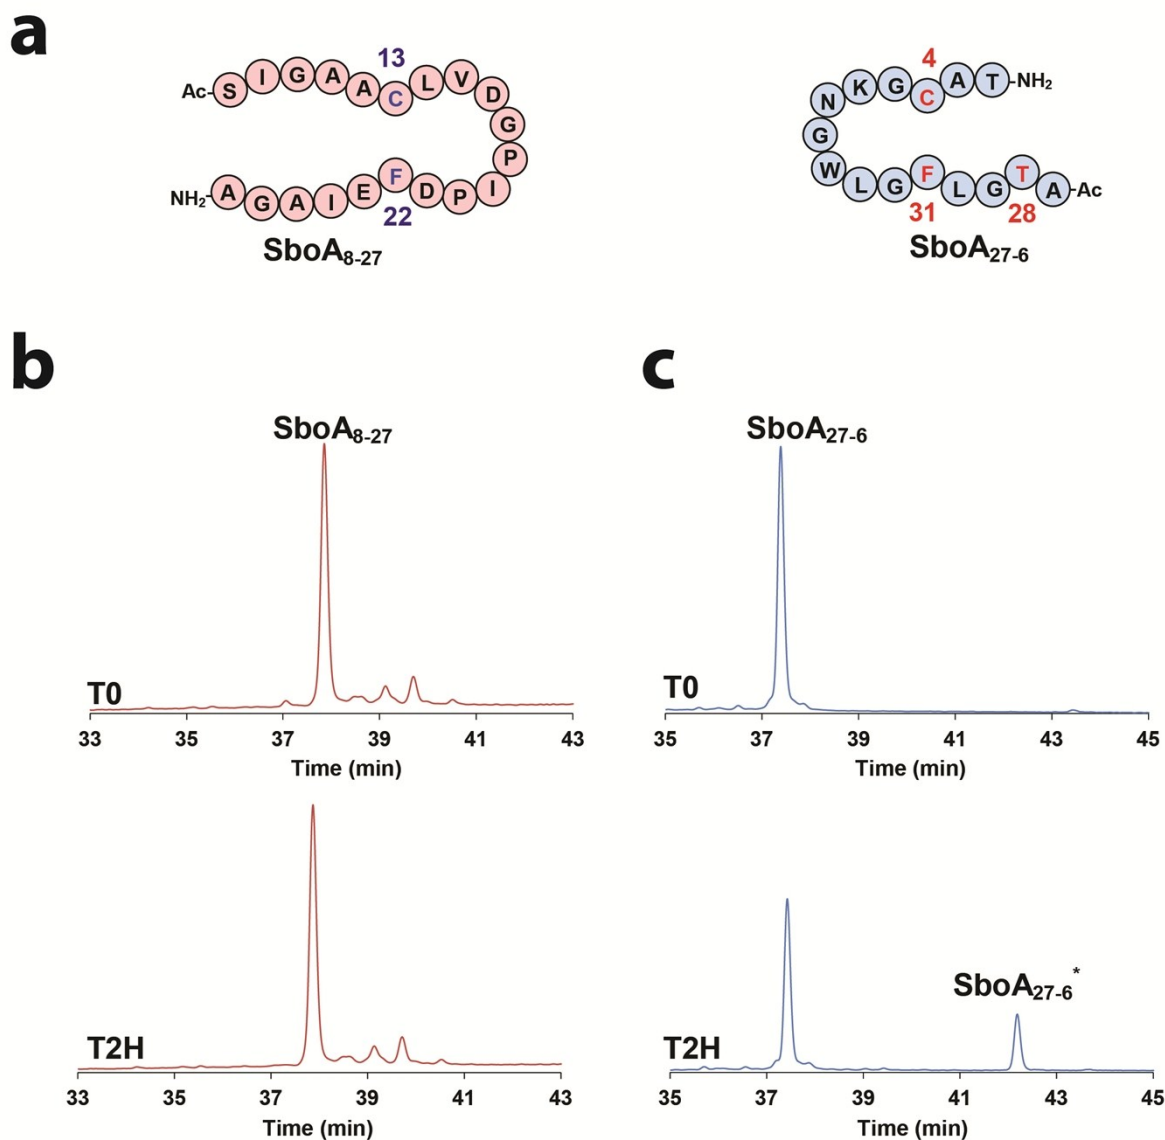

**Figure S3 – (a) Sequence of the synthetic peptides assayed as substrates: SboA<sub>8-27</sub> and SboA<sub>27-6</sub>. Amino acids involved in thioether bonds are labeled in blue or red. HPLC analysis of incubation of AlbA with (b) SboA<sub>8-27</sub> and (c) SboA<sub>27-6</sub> at T0 and after 120 min (UV detection at 215 nm). AlbA (20  $\mu$ M) was incubated under anaerobic and reducing conditions in the presence of SAM (1 mM), peptide substrate (1 mM) and sodium dithionite (2 mM). Only in the presence of SboA<sub>27-6</sub>, a new product SboA<sub>27-6</sub><sup>\*</sup> was formed.**

Figure S4

**a**

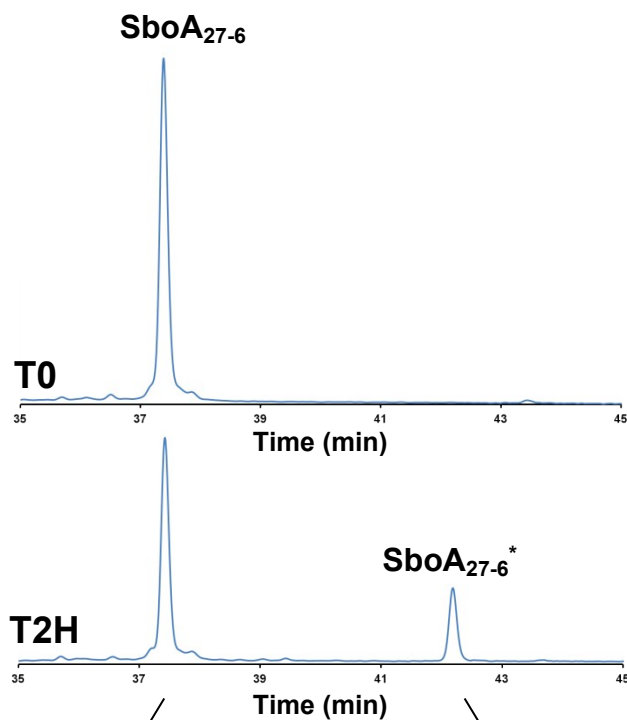

**b**

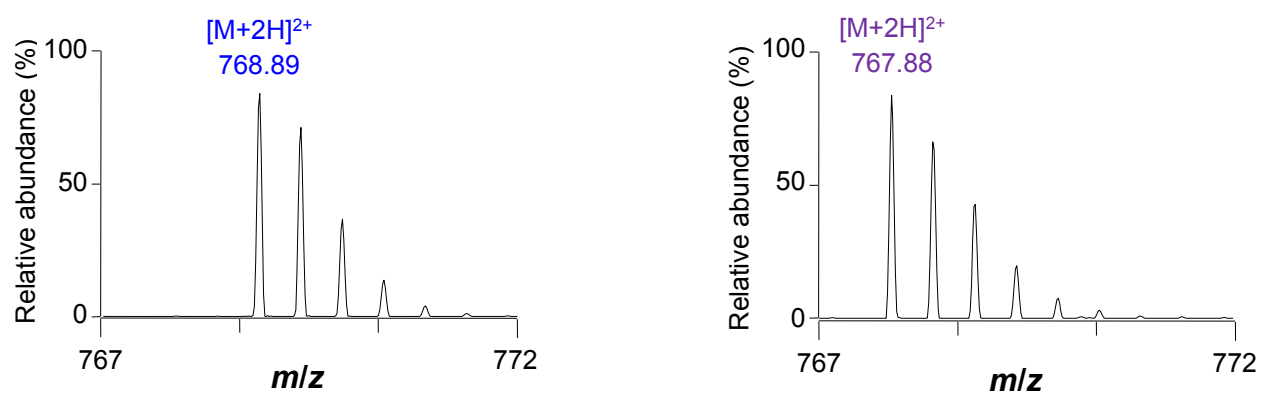

**Figure S4 - Activity of AlbA incubated with SboA<sub>27-6</sub>.** (a) HPLC analysis of SboA<sub>27-6</sub> with AlbA (UV detection at 215 nm). (b) LC-MS analysis of SboA<sub>27-6</sub> and the corresponding product SboA<sub>27-6</sub><sup>\*</sup>. AlbA was incubated with SboA<sub>27-6</sub> (1 mM) under anaerobic and reducing conditions in the presence of SAM (1mM) and sodium dithionite (2 mM).

Figure S5

**a**

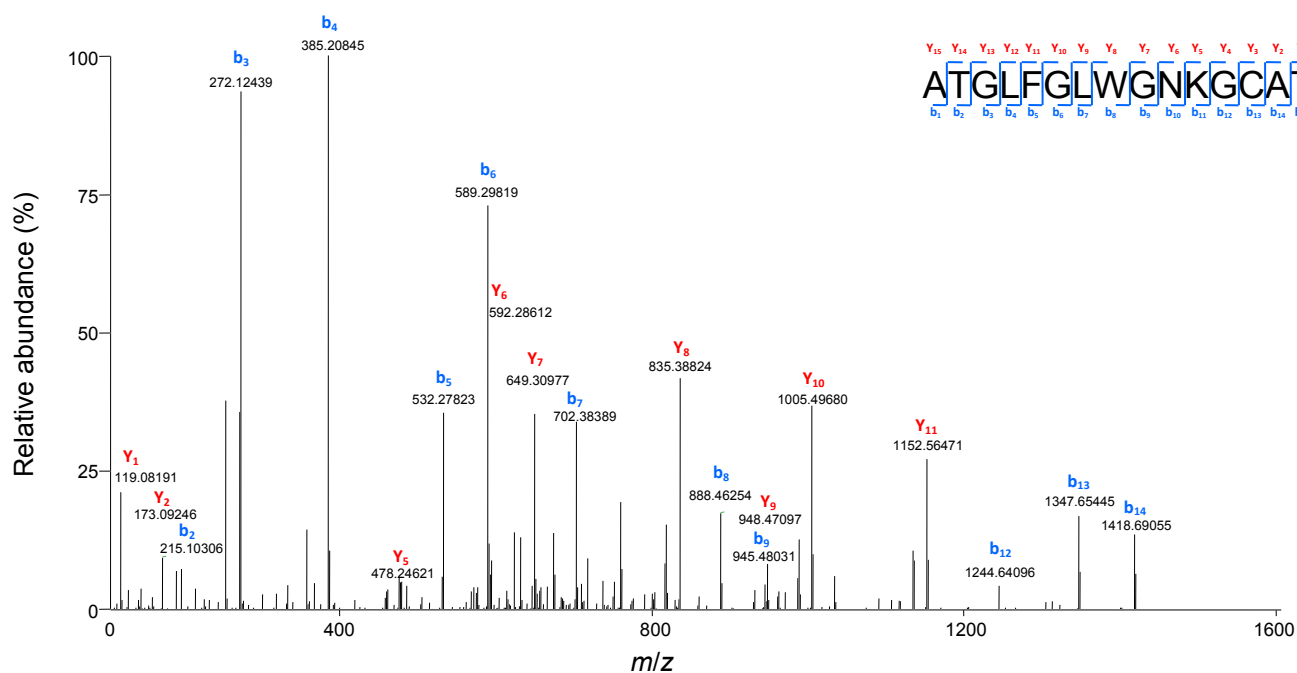

**b**

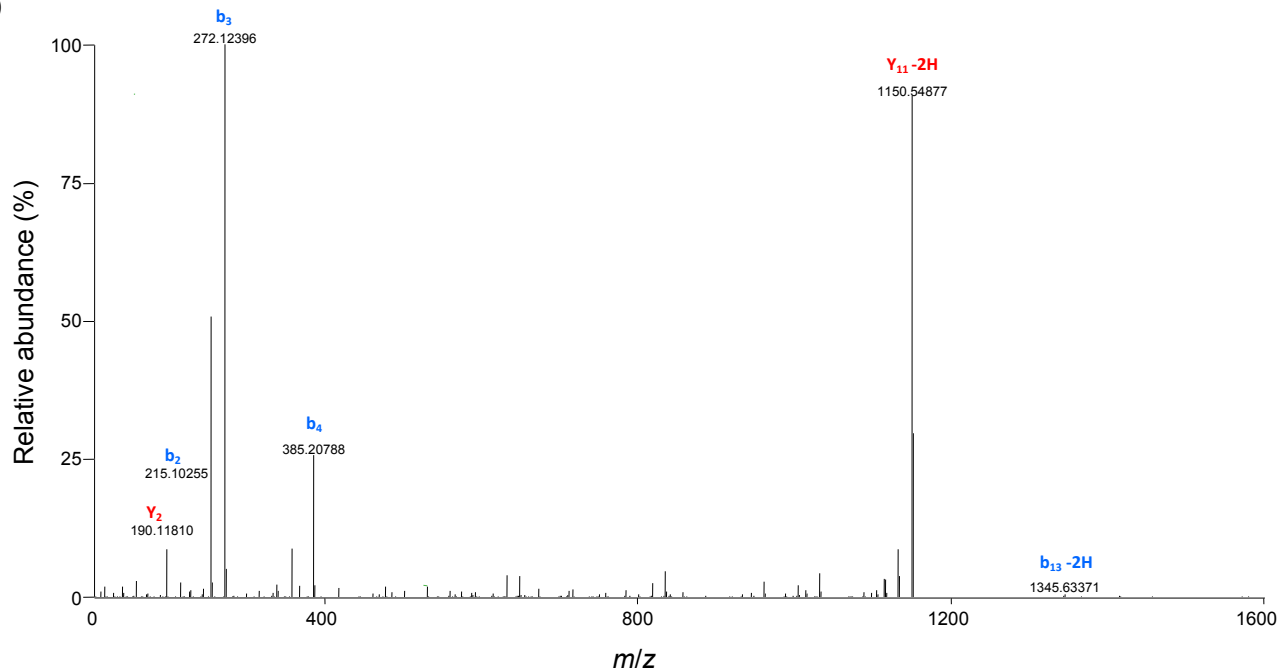

**Figure S5 - LC-MS<sup>2</sup> analysis of SboA<sub>27-6</sub> (a) and the cyclic peptide produced (b) by AlbA.** AlbA (20  $\mu$ M) was incubated in the presence of SAM (1 mM) and SboA<sub>27-6</sub> (1 mM) under anaerobic conditions with sodium dithionite (2 mM) as one-electron donor. Relevant fragments of the  $b$  and  $y$  series are indicated (see Table S2 for complete assignment).

Figure S6

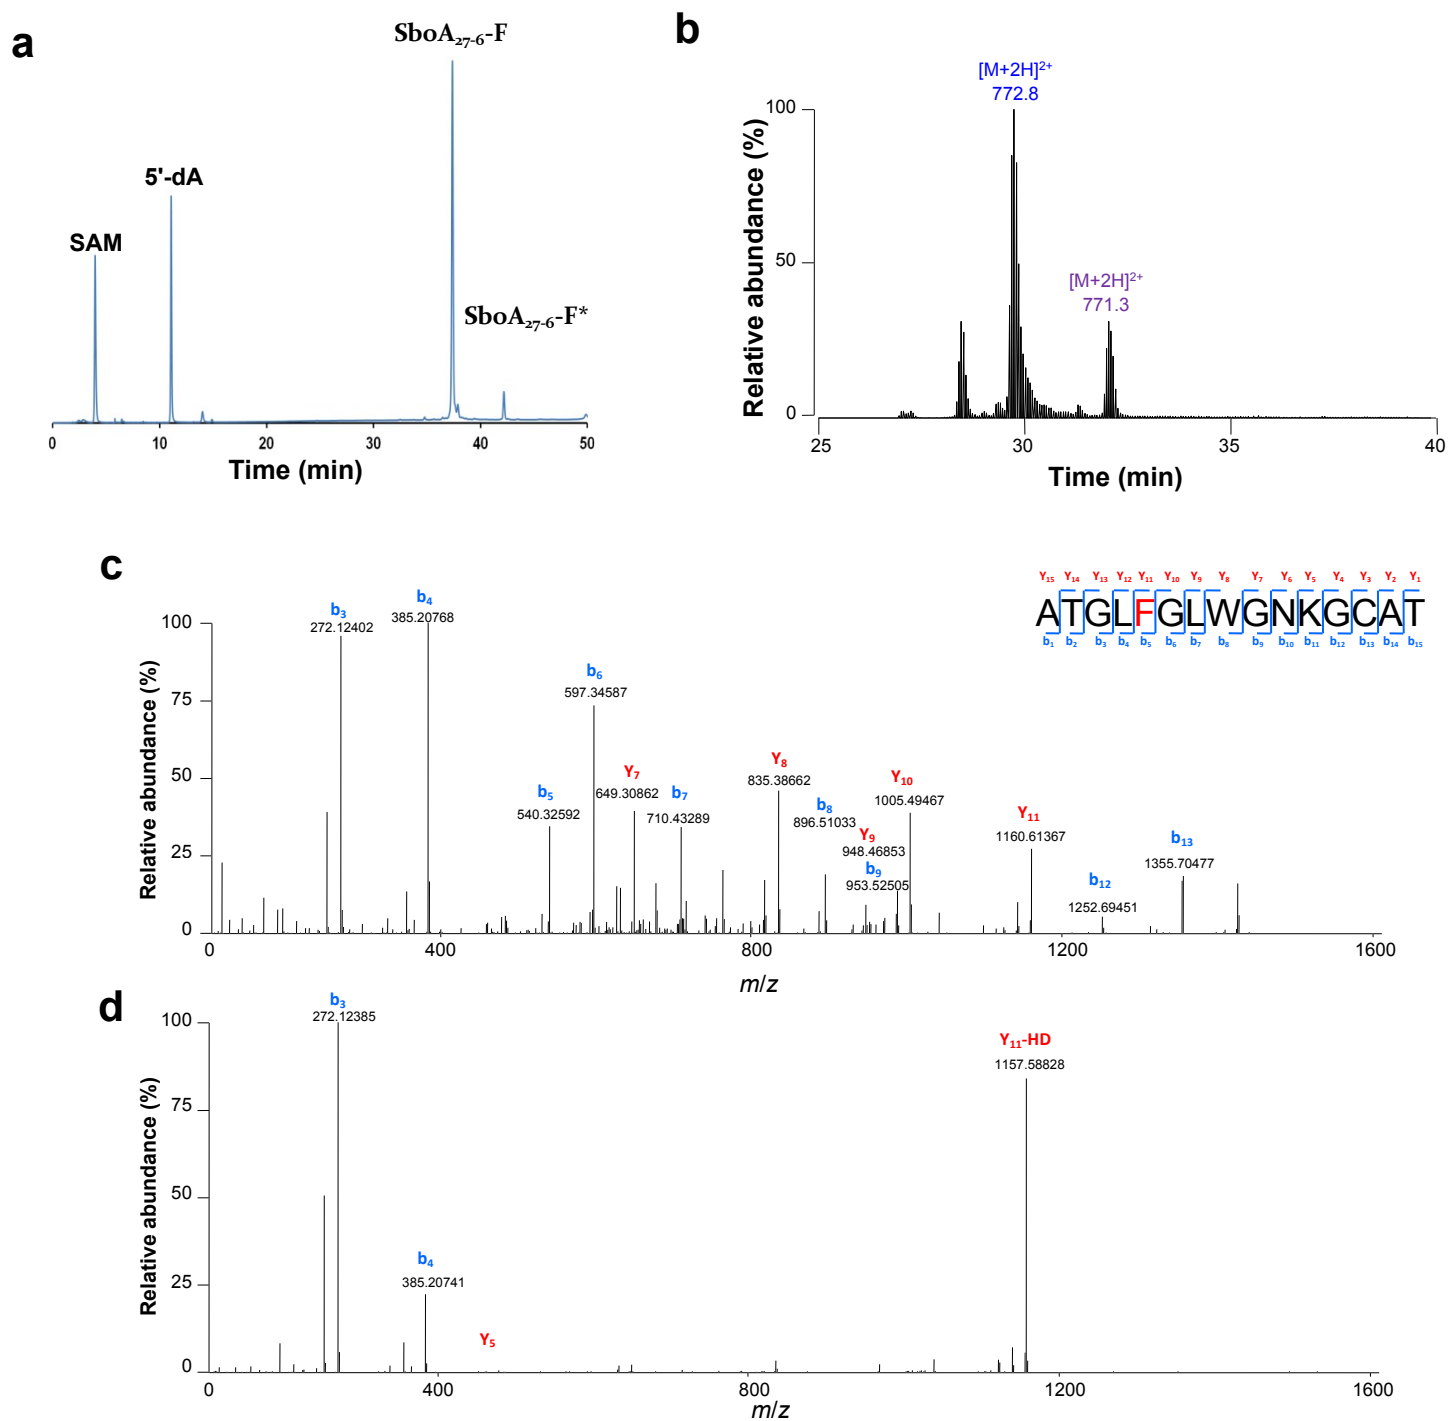

**Figure S6 - Activity of Alba incubated during 2 hours with SboA<sub>27-6</sub>-F:** (a) HPLC analysis of SboA<sub>27-6</sub>-F (UV detection at 280 nm). (b) LC-MS analysis of SboA<sub>27-6</sub>-F incubated with Alba. (c) LC-MS<sup>2</sup> analysis of SboA<sub>27-6</sub>-F and (d) the cyclic peptide SboA<sub>27-6</sub>-F\* formed. SboA<sub>27-6</sub>-F (1 mM) was incubated with Alba (20 μM) with SAM (1 mM) and sodium dithionite (2 mM) under anaerobic conditions. Relevant fragments of the *b* and *y* series are indicated (see Table S3 for complete assignment).

Figure S7

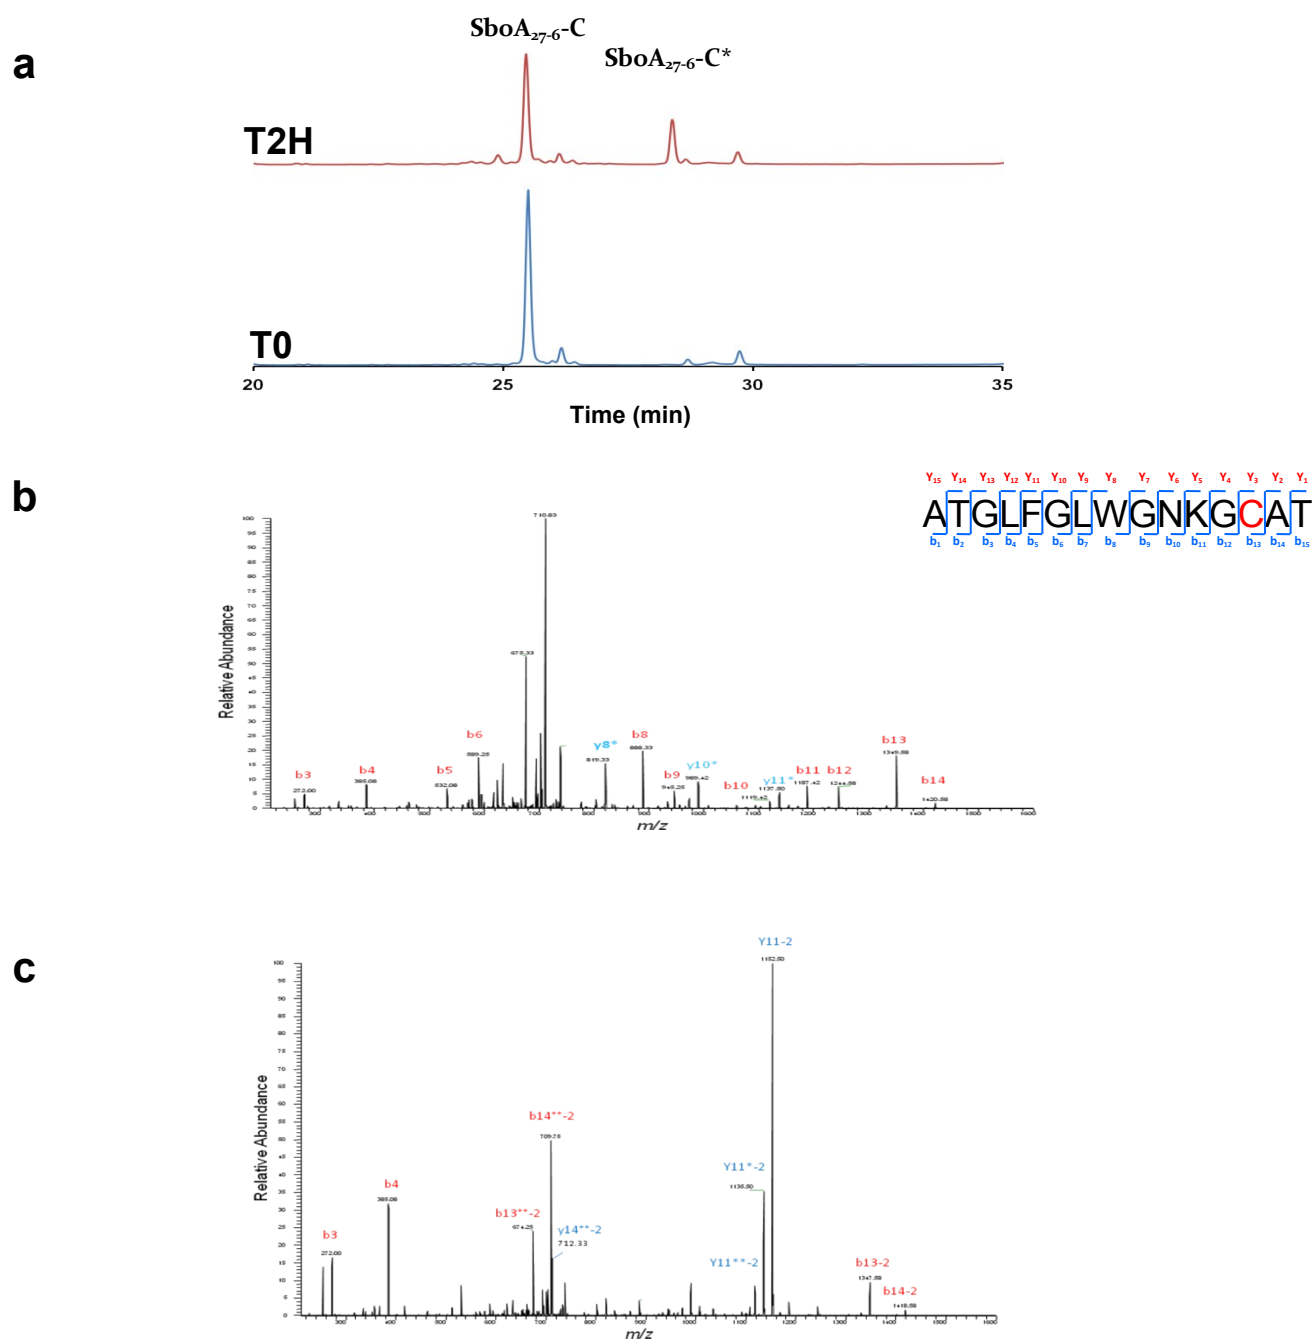

**Figure S7 - Activity of AlbA incubated during 2 hours with SboA<sub>27-6</sub>-C: (a) HPLC analysis of AlbA incubated in the presence of SboA<sub>27-6</sub>-C (215 nm). (b) LC-MS<sup>2</sup> analysis of SboA<sub>27-6</sub>-C and (c) of the cyclic peptide SboA<sub>27-6</sub>-C\* formed. SboA<sub>27-6</sub>-C (1 mM) was incubated with AlbA (20  $\mu$ M) under anaerobic conditions with flavodoxin/flavodoxin reductase/NADPH<sup>+</sup> as one electron donor. Relevant fragments of the *b* and *y* series are indicated (see Table S4 for complete assignment).**

**Figure S8**

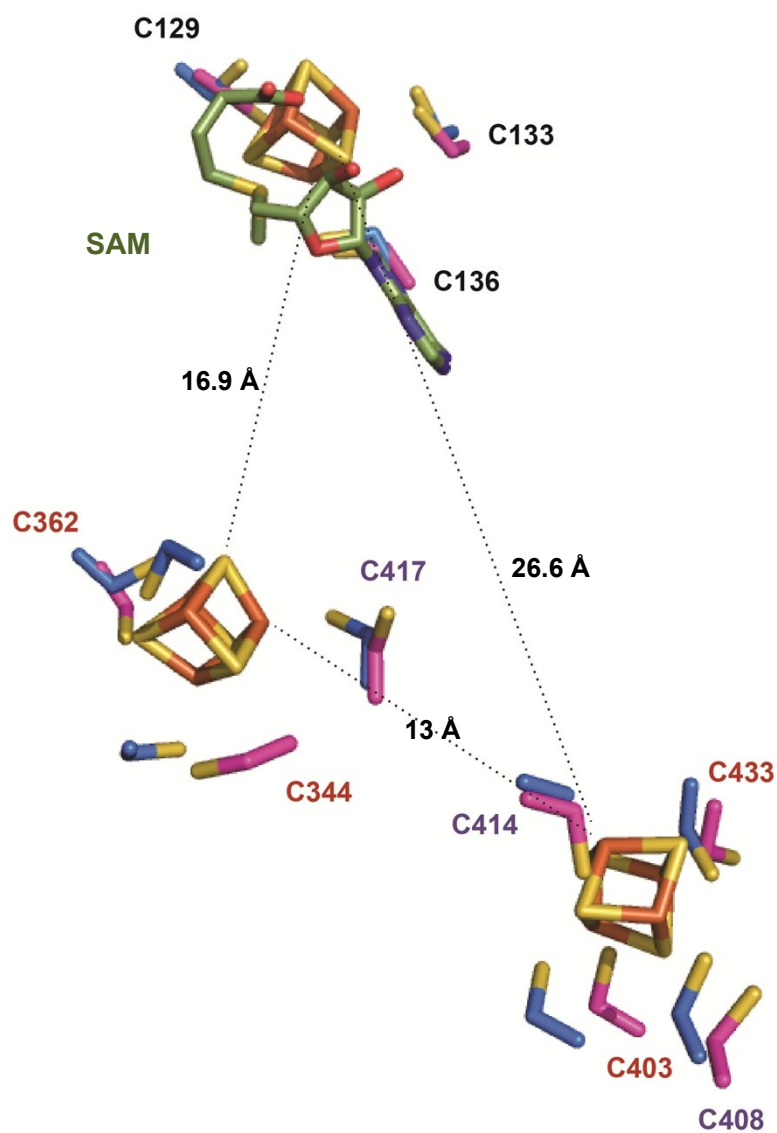

**Figure S8 –Structural model of AlbA iron-sulfur centers.** The cysteine residues involved in the coordination of [4Fe-4S] centers are depicted in blue for anSME and in pink for AlbA. Numbers in purple indicate cysteine residues of AlbA from the SPASM-domain previously mutated. Estimated distances between the [4Fe-4S] centers are indicated.

**Figure S9**

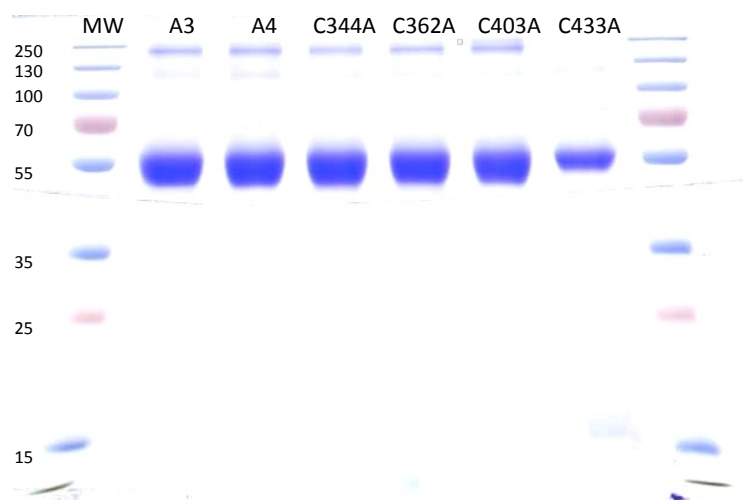

**Figure S9 - Gel electrophoresis analysis of purified AlbA mutants.**

A3: AlbA lacking radical SAM binding motif: Cx3Cx2C

A4: AlbA mutated on residues Cys<sup>344</sup>, Cys<sup>362</sup>, Cys<sup>403</sup> and Cys<sup>433</sup>

C344A: AlbA mutated on residue Cys<sup>344</sup>

C362A: AlbA mutated on residue Cys<sup>362</sup>

C403A: AlbA mutated on residue Cys<sup>403</sup>

C433A: AlbA mutated on residue Cys<sup>433</sup>

MW: molecular weight markers

Figure S10

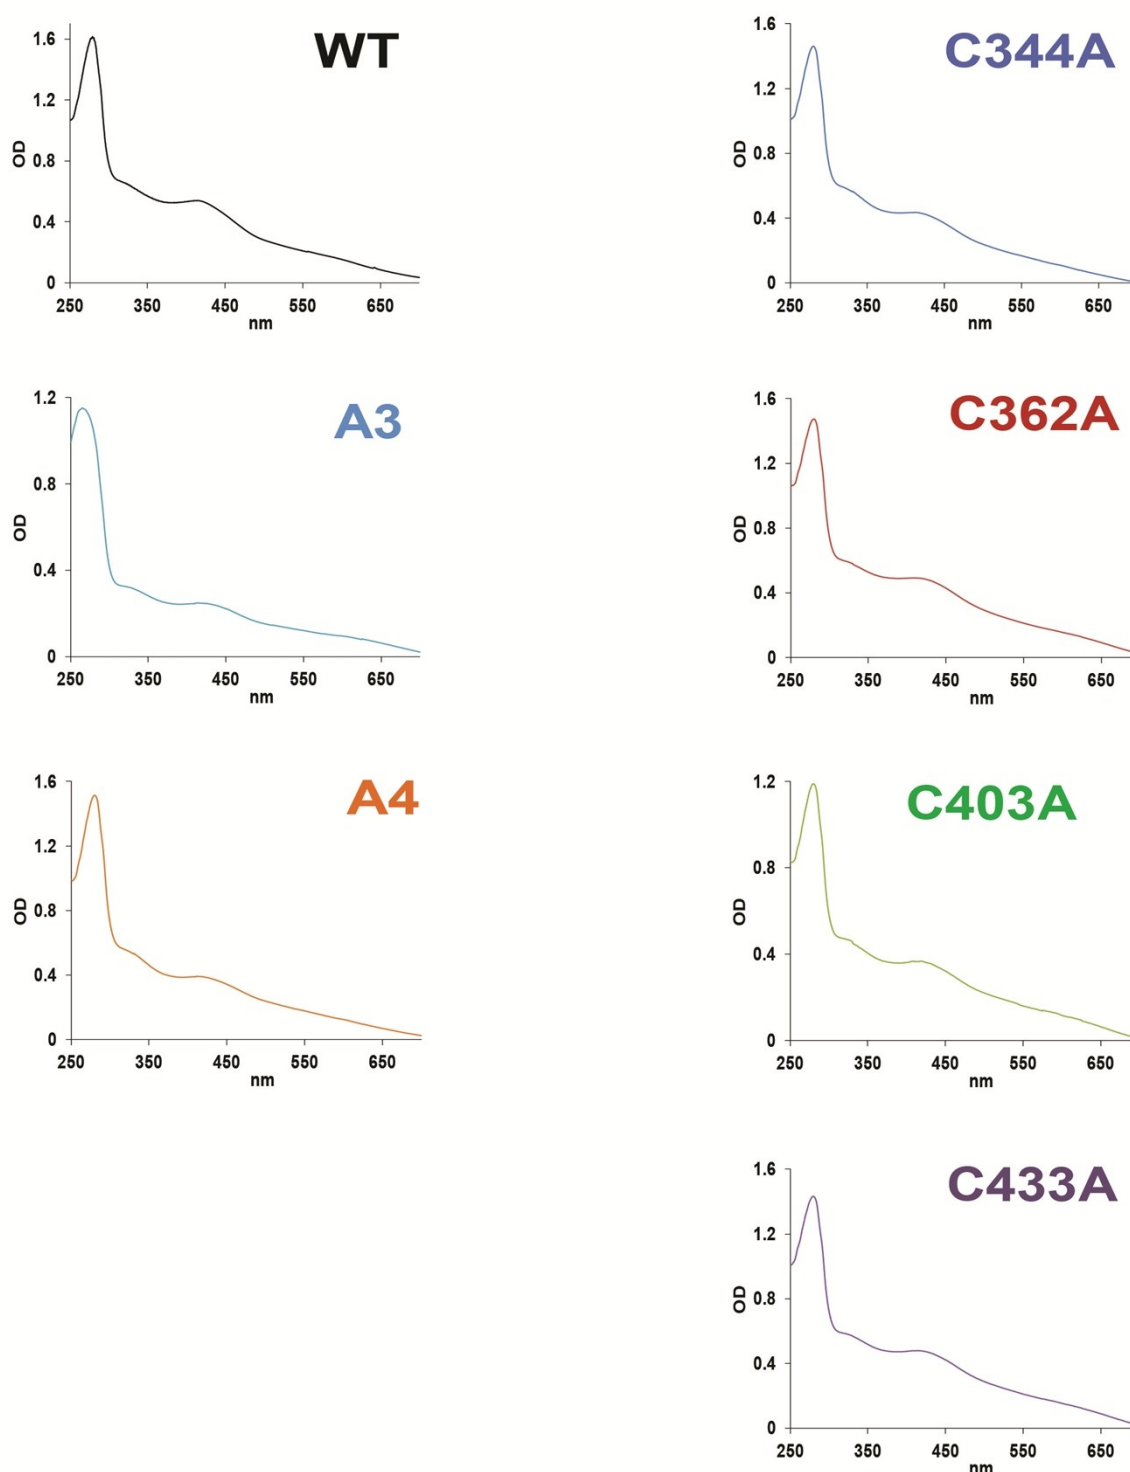

**Figure S10 - UV-visible spectrum of purified wild-type (WT) AlbA and cysteine mutants after anaerobic reconstitution.** C344A, C362A, C403 and C433A indicate the spectrum corresponding to AlbA single mutants: **C344A**, **C362A**, **C403A** and **C433A**. The **A3 mutant** lacks the radical SAM motif (Cx3Cx2C) while the **A4 mutant** is mutated on the four cysteine residues C344A, C362A, C403A and C433A.

**Figure S11**

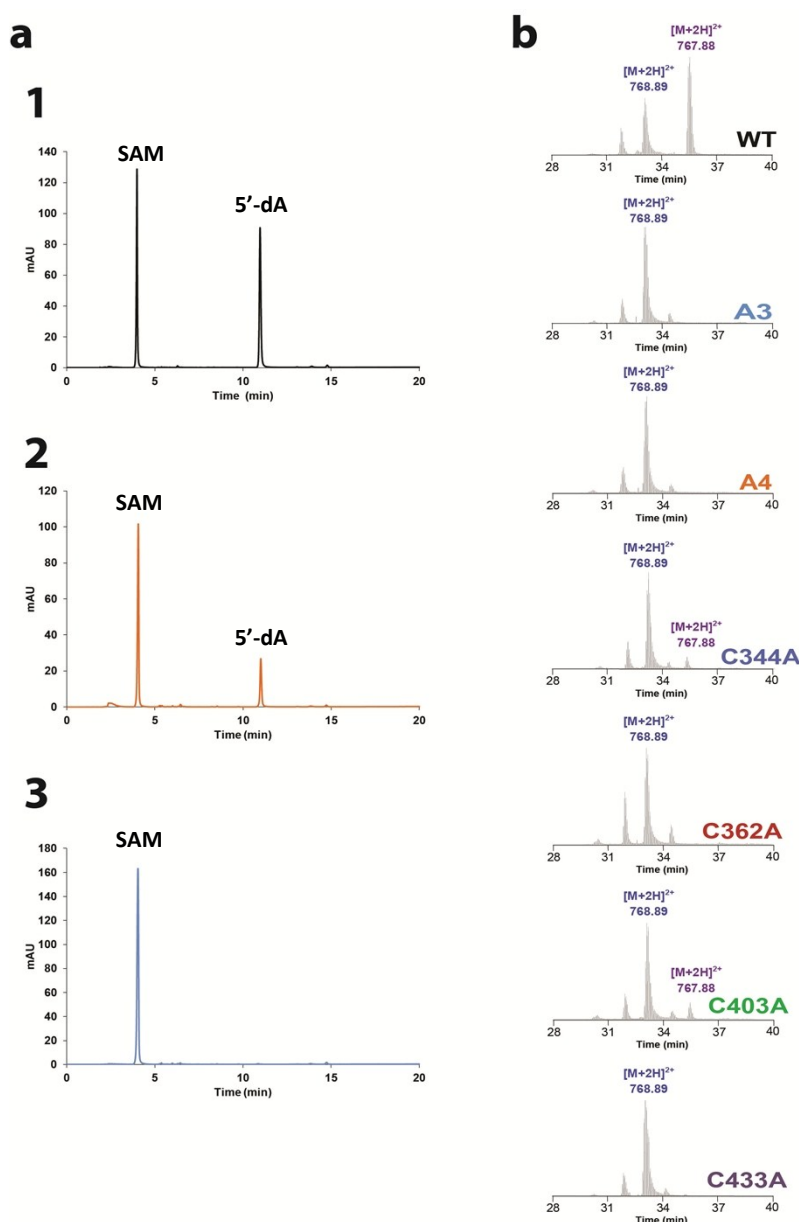

**Figure S11 - (a) SAM cleavage activity of (trace 1) AlbA, (trace 2) AlbA mutated on residues Cys<sup>344</sup>, Cys<sup>362</sup>, Cys<sup>403</sup> and Cys<sup>433</sup> (A4 mutant) and (trace 3) AlbA lacking radical SAM binding motif: Cx3Cx2C (A3 mutant). HPLC analysis performed on reverse phase column with UV detection at 257 nm. Proteins were incubated with SboA<sub>27-6</sub> (1 mM) under anaerobic and reducing conditions in the presence of SAM (1mM) and sodium dithionite (2 mM). (b) LC-MS analysis of the peptide substrate SboA<sub>27-6</sub> incubated with WT AlbA and the corresponding mutants. The SboA<sub>27-6</sub> peptide [M+2H]<sup>2+</sup>: 768.89 is converted into the cyclic peptide SboA<sub>27-6</sub><sup>\*</sup> [M+2H]<sup>2+</sup>: 767.88 only in the presence of the WT enzyme or the C344A and C403A mutants. Each protein (20  $\mu$ M) was incubated under anaerobic and reducing conditions in the presence of SAM (1 mM), peptide substrate (1 mM) and sodium dithionite (2 mM).**

**Table S1**Fragmentation pattern of **SboA<sub>8-27</sub>**

| SboA <sub>8-27</sub> | Sequence | #  | B          | Y          | # (+1) |
|----------------------|----------|----|------------|------------|--------|
|                      |          |    |            |            |        |
|                      | S        | 1  | 130.05046  | 1956.97412 | 20     |
|                      | I        | 2  | 243.13452  | 1827.93153 | 19     |
|                      | G        | 3  | 300.15599  | 1714.84747 | 18     |
|                      | A        | 4  | 371.1931   | 1657.82601 | 17     |
|                      | A        | 5  | 442.23021  | 1586.78889 | 16     |
|                      | C        | 6  | 545.2394   | 1515.75178 | 15     |
|                      | L        | 7  | 658.32346  | 1412.74259 | 14     |
|                      | V        | 8  | 757.39188  | 1299.65853 | 13     |
|                      | D        | 9  | 872.41882  | 1200.59012 | 12     |
|                      | G        | 10 | 929.44028  | 1085.56317 | 11     |
|                      | P        | 11 | 1026.49305 | 1028.54171 | 10     |
|                      | I        | 12 | 1139.57711 | 931.48895  | 9      |
|                      | P        | 13 | 1236.62987 | 818.40488  | 8      |
|                      | D        | 14 | 1351.65682 | 721.35212  | 7      |
|                      | F        | 15 | 1498.72523 | 606.32518  | 6      |
|                      | E        | 16 | 1627.76782 | 459.25676  | 5      |
|                      | I        | 17 | 1740.85189 | 330.21417  | 4      |
|                      | A        | 18 | 1811.889   | 217.13011  | 3      |
|                      | G        | 19 | 1868.91046 | 146.09299  | 2      |
|                      | A        | 20 | 1938.96356 | 89.07153   | 1      |

**Table S2**Fragmentation pattern of **SboA<sub>27-6</sub>**

| SboA <sub>27-6</sub> | Sequence | #  | B          | Y          | # (+1) |
|----------------------|----------|----|------------|------------|--------|
|                      |          |    |            |            |        |
|                      | A        | 1  | 114.05554  | 1536.76334 | 15     |
|                      | T        | 2  | 215.10322  | 1423.71567 | 14     |
|                      | G        | 3  | 272.12469  | 1322.66799 | 13     |
|                      | L        | 4  | 385.20875  | 1265.64653 | 12     |
|                      | F        | 5  | 532.27716  | 1152.56246 | 11     |
|                      | G        | 6  | 589.29863  | 1005.49405 | 10     |
|                      | L        | 7  | 702.38269  | 948.47258  | 9      |
|                      | W        | 8  | 888.462    | 835.38852  | 8      |
|                      | G        | 9  | 945.48347  | 649.30921  | 7      |
|                      | N        | 10 | 1059.52639 | 592.28775  | 6      |
|                      | K        | 11 | 1187.62136 | 478.24482  | 5      |

|  |          |    |            |           |   |
|--|----------|----|------------|-----------|---|
|  | <b>G</b> | 12 | 1244.64282 | 350.14986 | 4 |
|  | <b>C</b> | 13 | 1347.652   | 293.12839 | 3 |
|  | <b>A</b> | 14 | 1418.68912 | 190.11921 | 2 |
|  | <b>T</b> | 15 | 1518.75278 | 119.08209 | 1 |

**Table S3**

Fragmentation pattern of **SboA<sub>27-6</sub>-F**

| SboA <sub>27-6</sub> -F* | Seq      | #  | B          | Y          | # (+1) |
|--------------------------|----------|----|------------|------------|--------|
|                          |          |    |            |            |        |
|                          | <b>A</b> | 1  | 114.05554  | 1544.81246 | 15     |
|                          | <b>T</b> | 2  | 215.10322  | 1431.76479 | 14     |
|                          | <b>G</b> | 3  | 272.12469  | 1330.71711 | 13     |
|                          | <b>L</b> | 4  | 385.20875  | 1273.69565 | 12     |
|                          | <b>F</b> | 5  | 540.32628  | 1160.61158 | 11     |
|                          | <b>G</b> | 6  | 597.34775  | 1005.49405 | 10     |
|                          | <b>L</b> | 7  | 710.43181  | 948.47258  | 9      |
|                          | <b>W</b> | 8  | 896.51112  | 835.38852  | 8      |
|                          | <b>G</b> | 9  | 953.53259  | 649.30921  | 7      |
|                          | <b>N</b> | 10 | 1067.57551 | 592.28775  | 6      |
|                          | <b>K</b> | 11 | 1195.67048 | 478.24482  | 5      |
|                          | <b>G</b> | 12 | 1252.69194 | 350.14986  | 4      |
|                          | <b>C</b> | 13 | 1355.70112 | 293.12839  | 3      |
|                          | <b>A</b> | 14 | 1426.73824 | 190.11921  | 2      |
|                          | <b>T</b> | 15 | 1526.8019  | 119.08209  | 1      |

**Table S4**

Fragmentation pattern of **SboA<sub>27-6</sub>-C**

| SboA <sub>27-6</sub> -C* | Sequence | # | B         | Y          | # (+1) |
|--------------------------|----------|---|-----------|------------|--------|
|                          |          |   |           |            |        |
|                          | <b>A</b> | 1 | 114.05554 | 1538.77734 | 15     |
|                          | <b>T</b> | 2 | 215.10322 | 1425.72967 | 14     |
|                          | <b>G</b> | 3 | 272.12469 | 1324.38199 | 13     |
|                          | <b>L</b> | 4 | 385.20875 | 1267.66053 | 12     |
|                          | <b>F</b> | 5 | 532.27716 | 1154.57646 | 11     |
|                          | <b>G</b> | 6 | 589.29863 | 1007.50805 | 10     |
|                          | <b>L</b> | 7 | 702.38269 | 950.48658  | 9      |
|                          | <b>W</b> | 8 | 888.462   | 837.40252  | 8      |

|  |          |    |            |           |   |
|--|----------|----|------------|-----------|---|
|  | <b>G</b> | 9  | 945.48347  | 651.32321 | 7 |
|  | <b>N</b> | 10 | 1059.52639 | 594.30175 | 6 |
|  | <b>K</b> | 11 | 1187.62136 | 480.25882 | 5 |
|  | <b>G</b> | 12 | 1244.64282 | 352.16386 | 4 |
|  | <b>C</b> | 13 | 1349.666   | 295.14239 | 3 |
|  | <b>A</b> | 14 | 1420.70312 | 190.11921 | 2 |
|  | <b>T</b> | 15 | 1520.76678 | 119.08209 | 1 |
